# Supplementary material
Source: PubMed Central journal article supplement (PMC9014868)

**Fig. 3a**

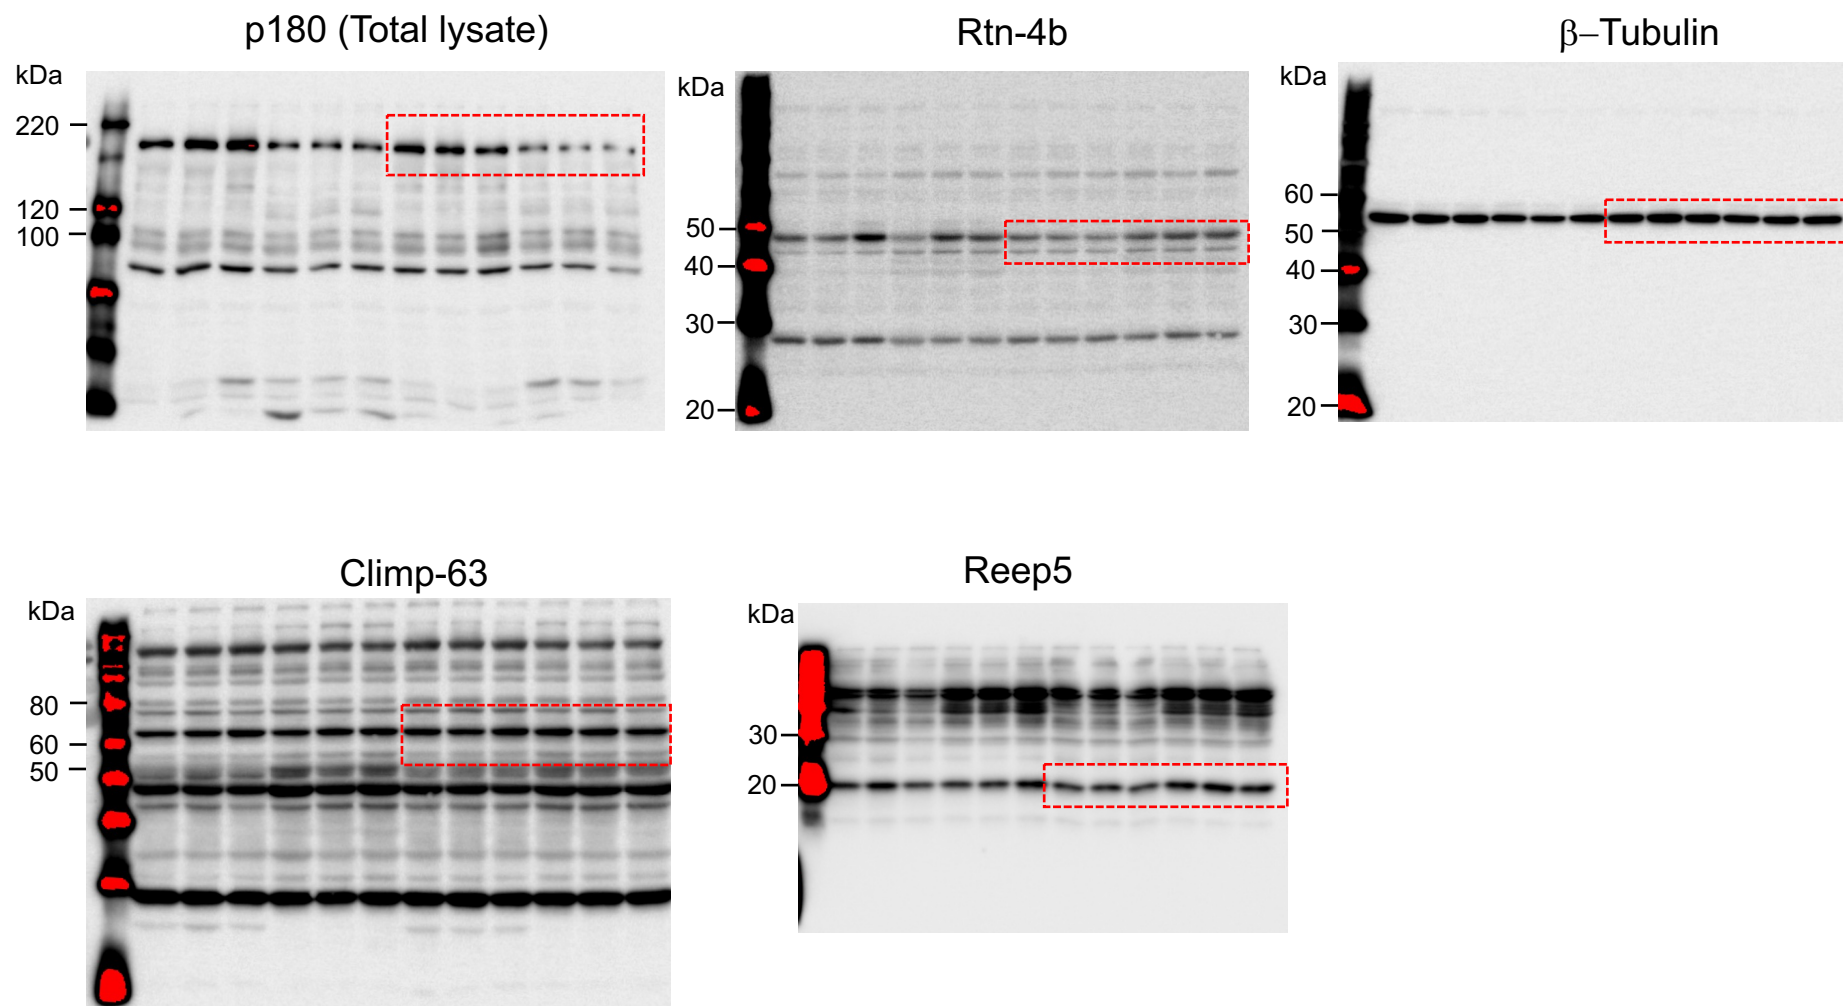

**Fig. 3b**

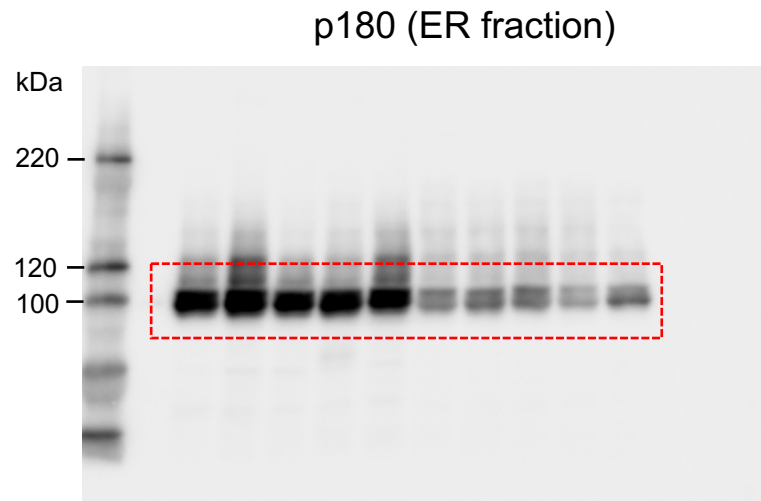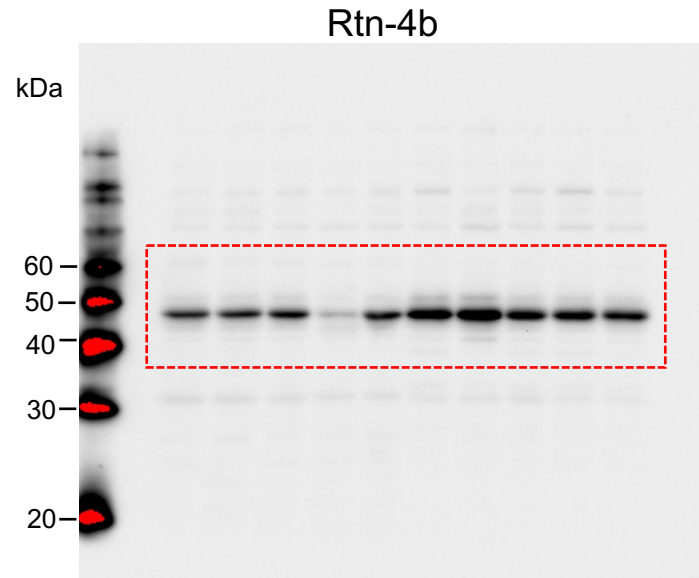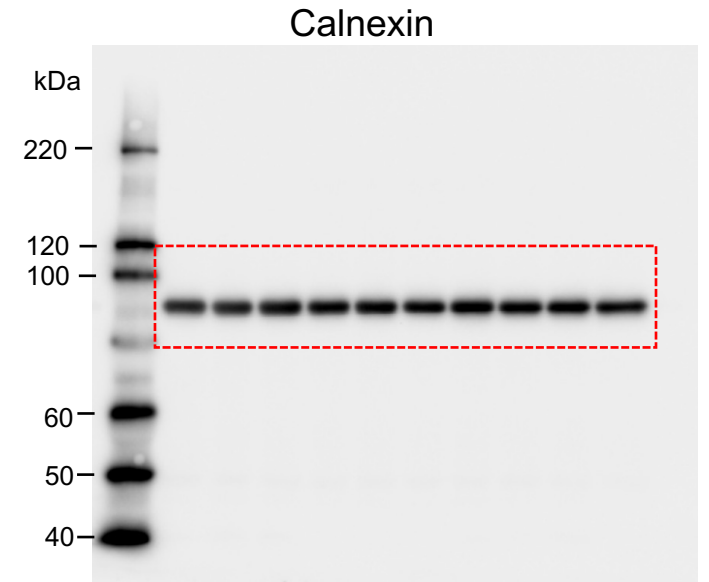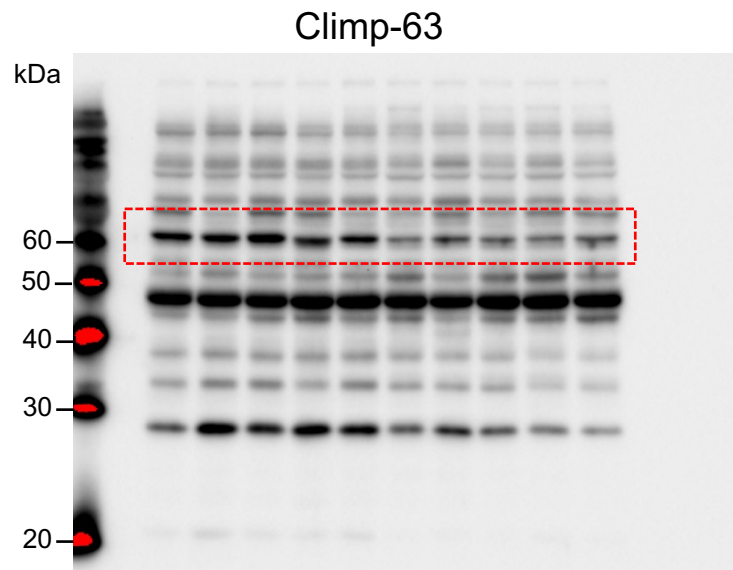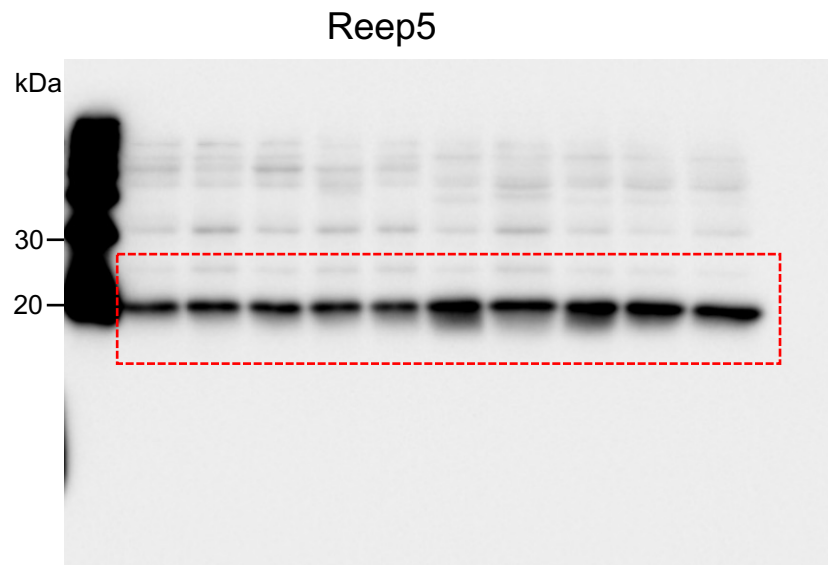

**Fig. 4j**

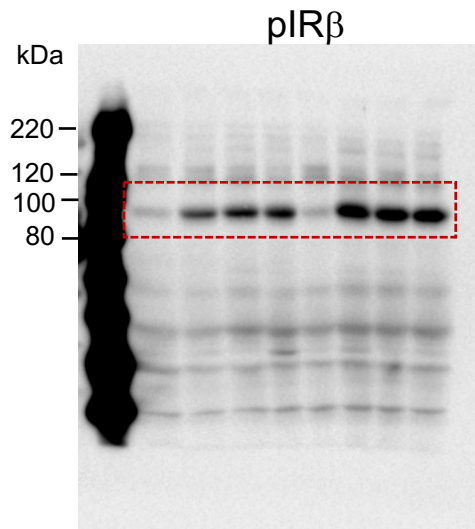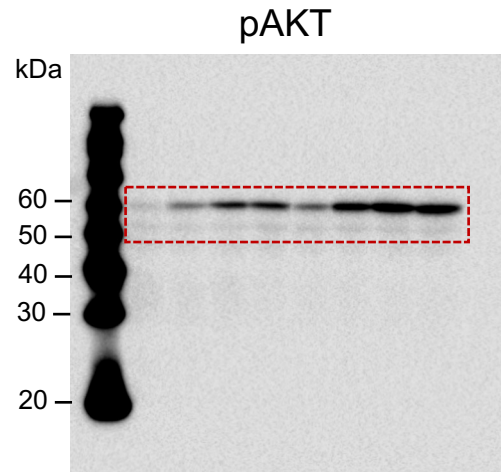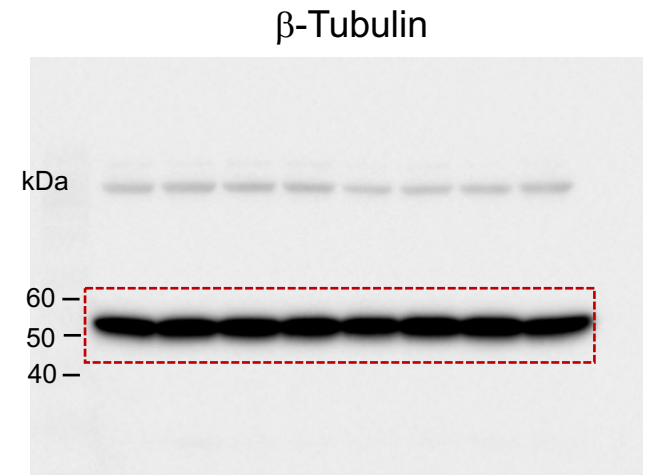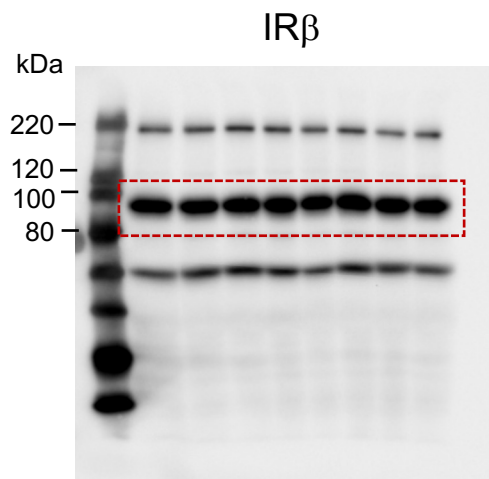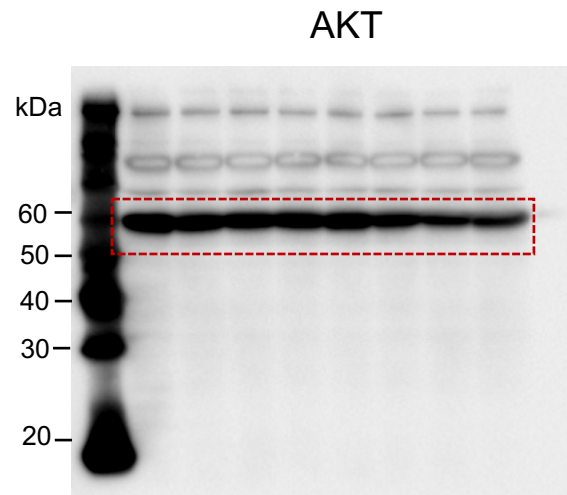

Ext Data Fig. 3a

Lean

Obese

COXIV

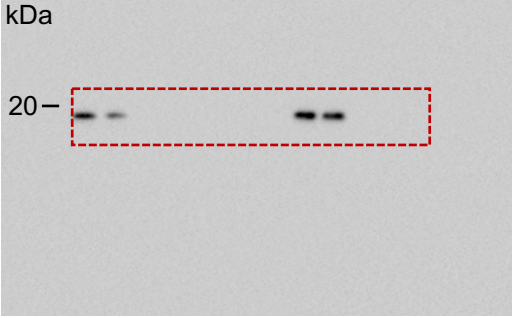

Trap $\alpha$

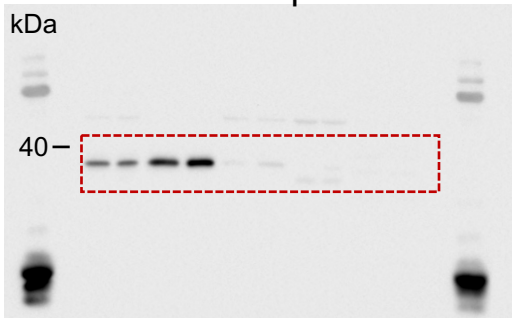

COXIV

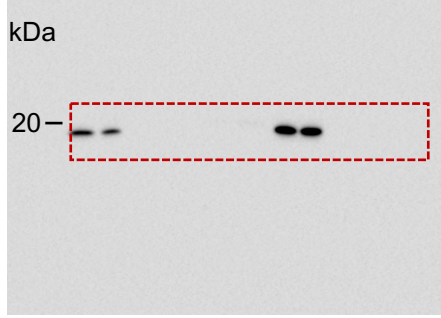

Trap $\alpha$

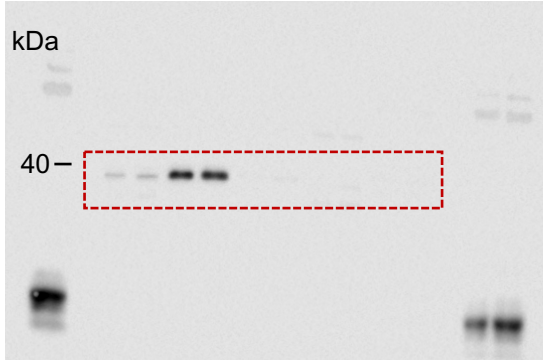

RTN4b

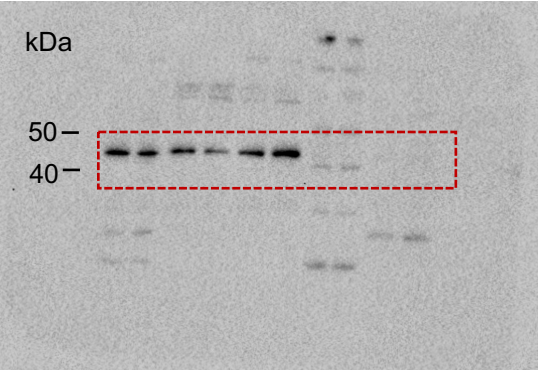

$\beta$ tubulin

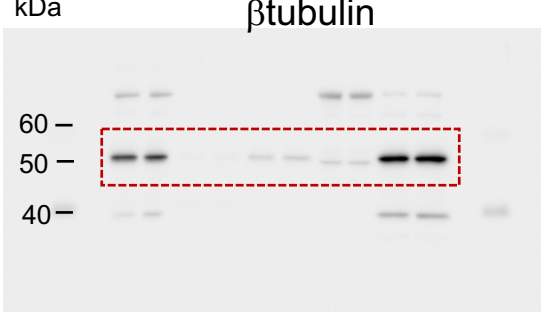

RTN4b

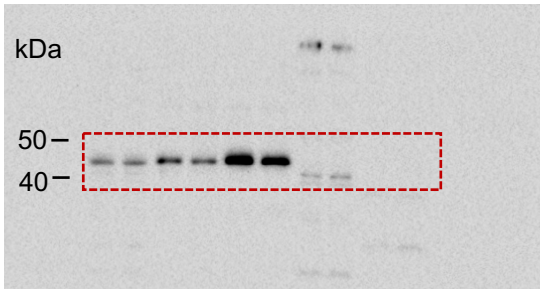

$\beta$ tubulin

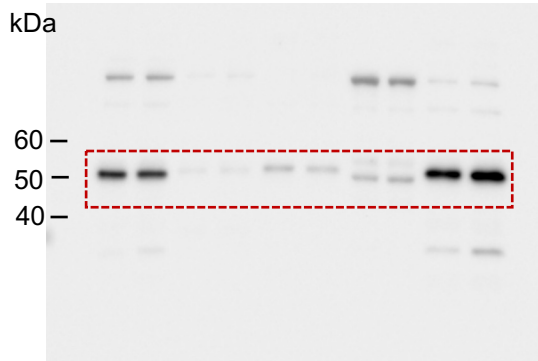

# Ext Data Fig. 4a

## Sec61 $\beta$

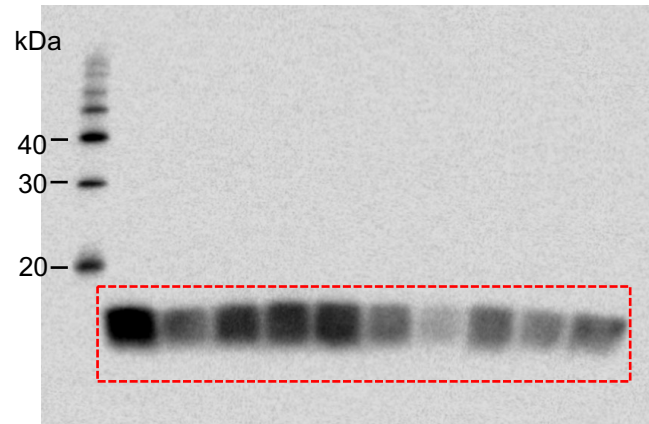

## Sec61 $\alpha$

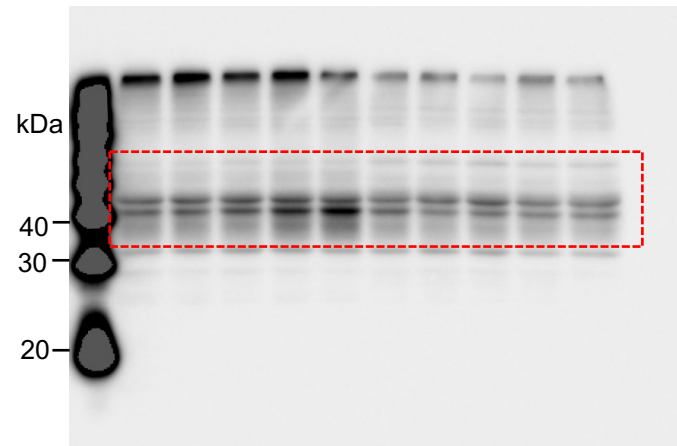

## Trap $\alpha$

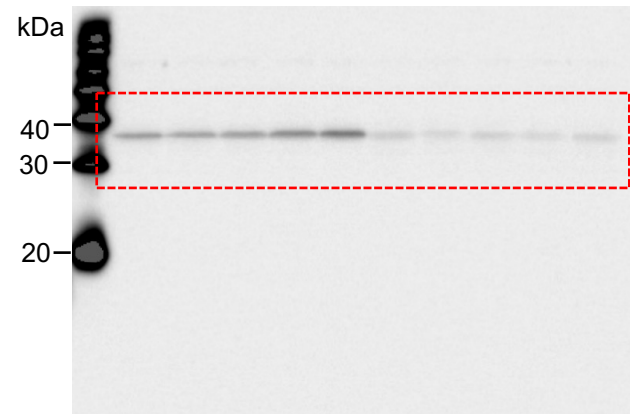

## Calnexin

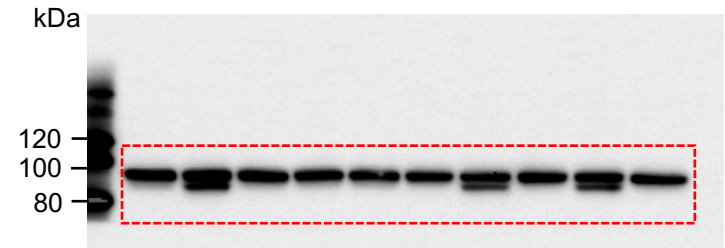

## $\beta$ -tubulin

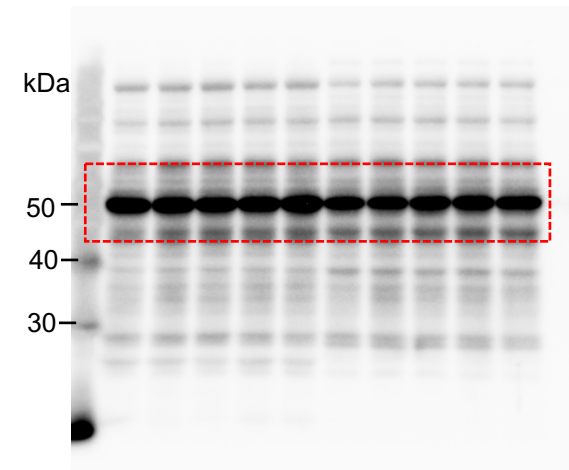



Ext Data Fig. 4b 4c

Trap $\alpha$

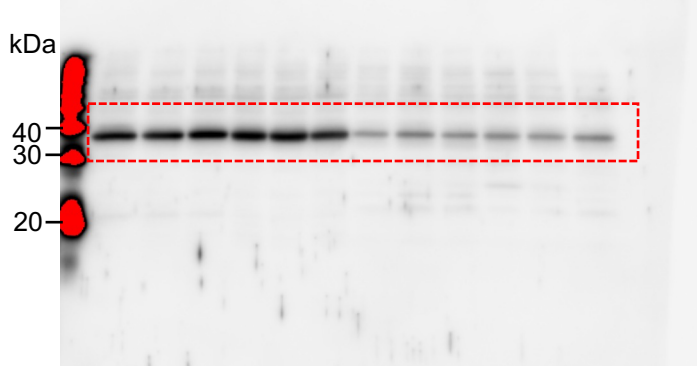

Sec61 $\alpha$

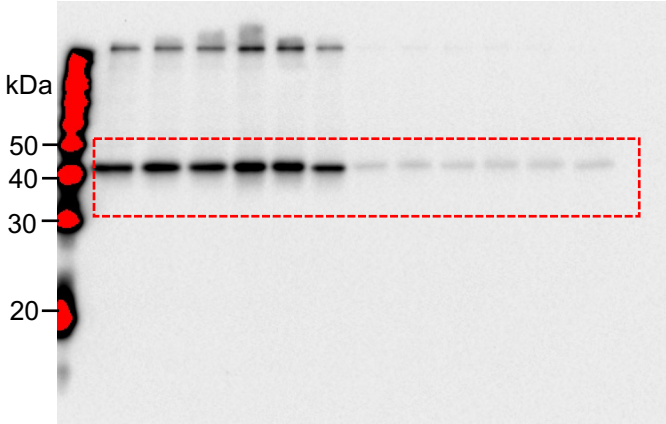

GRP78

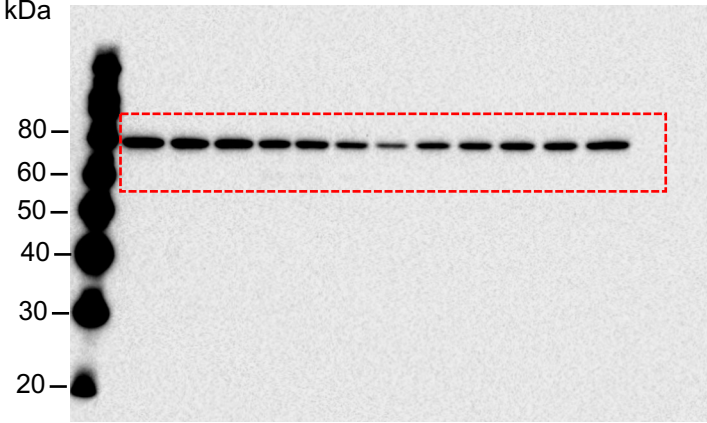

Sec61 $\beta$

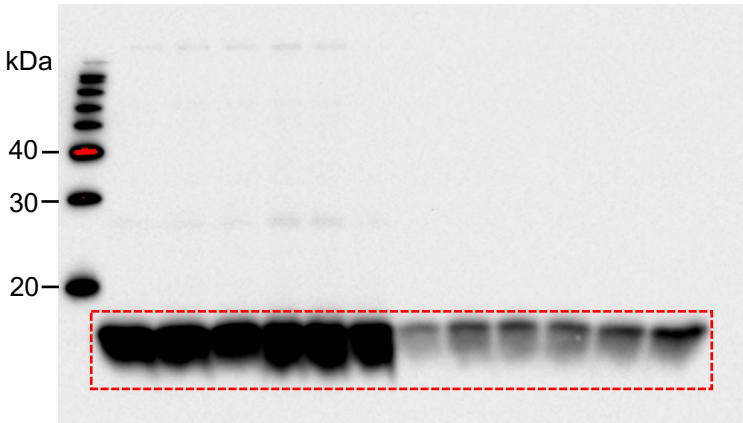

Calnexin

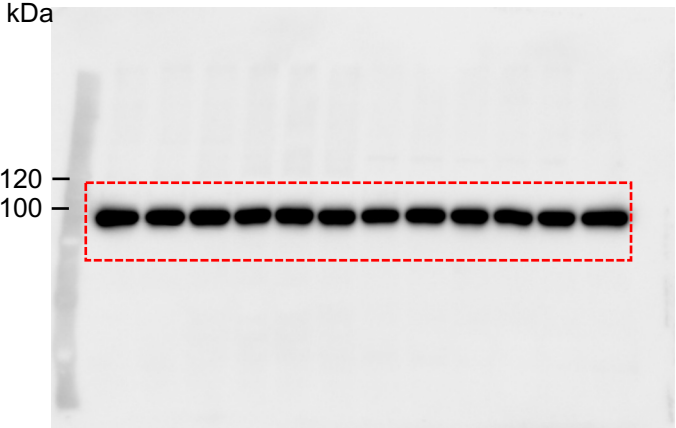

Ext Data Fig. 5a

Lean

Obese

CREB

COXIV

CREB

COXIV

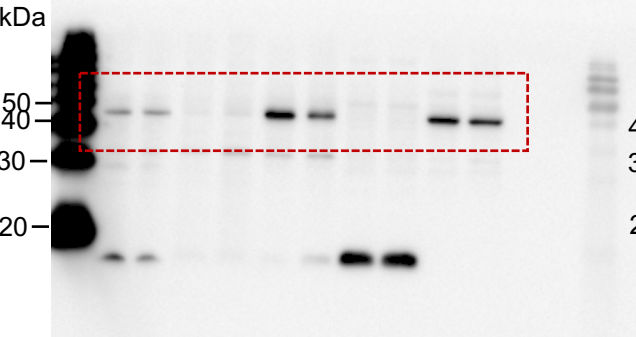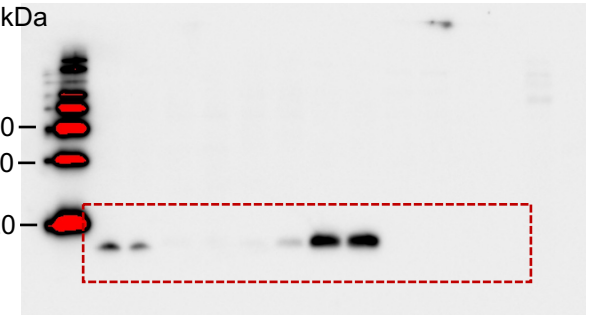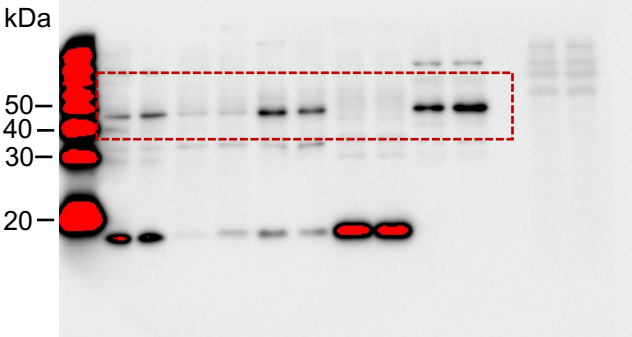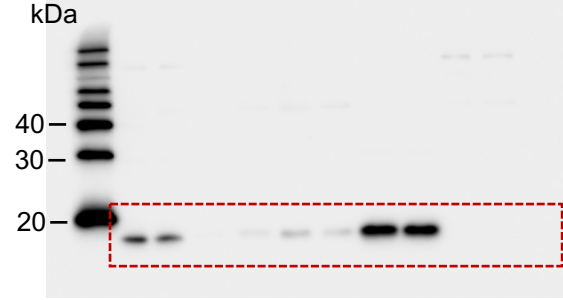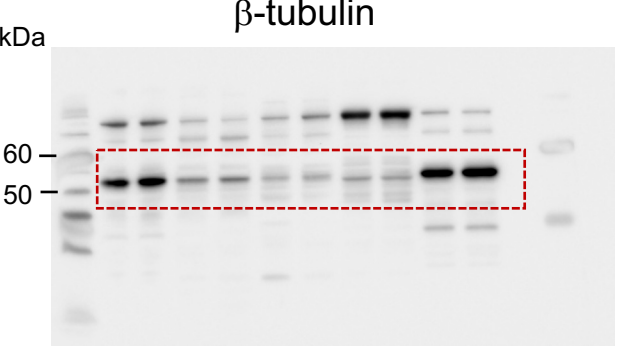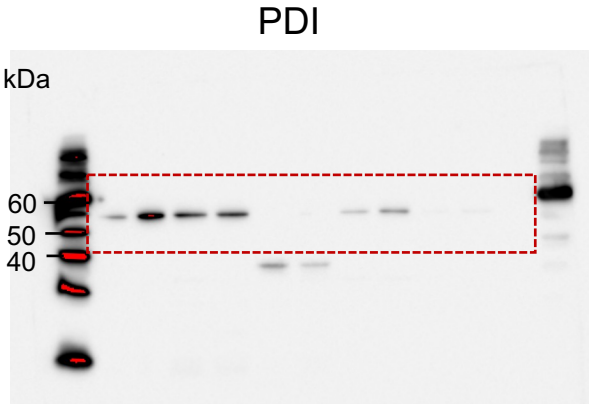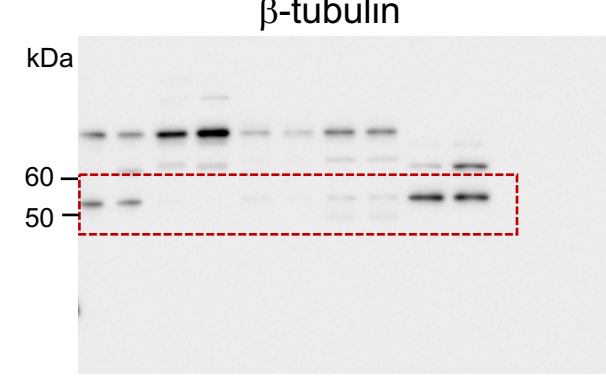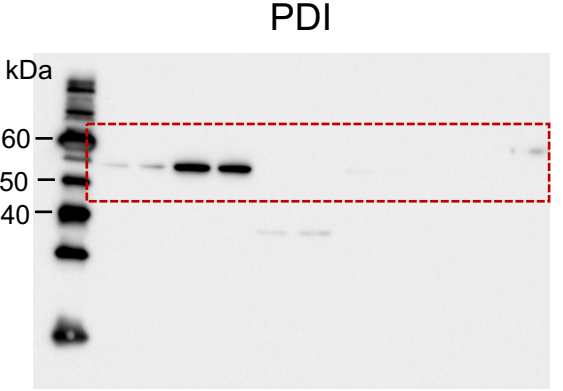

Climp63

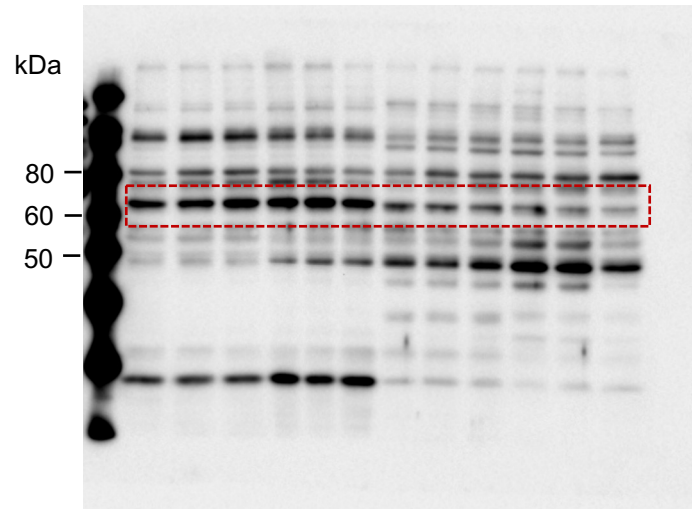

Ext Data Fig. 5b

Rtn4b

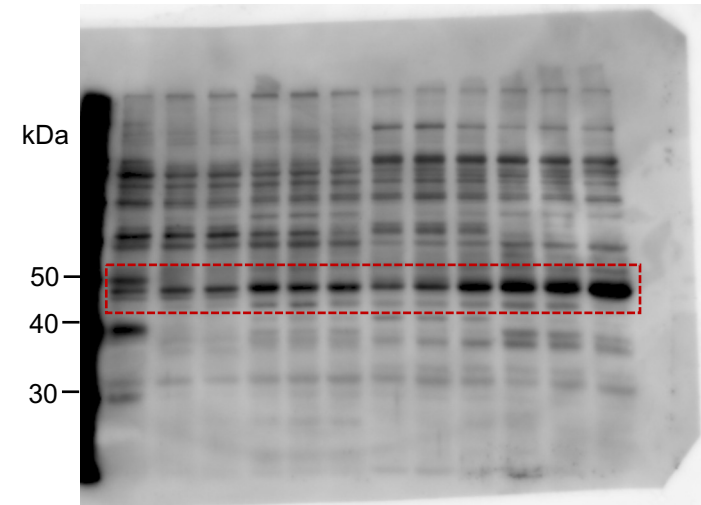

p180 (ER fraction)

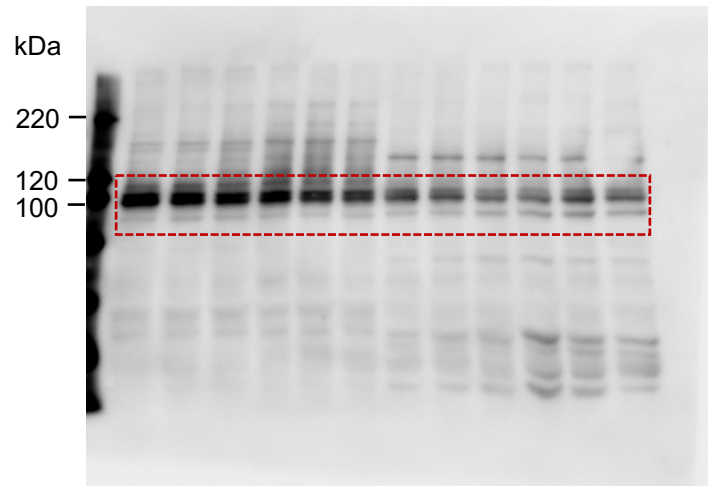



# Ext Data Fig. 5d 5e 5f

## RTN4a (GFP tagged) and Rtn4b

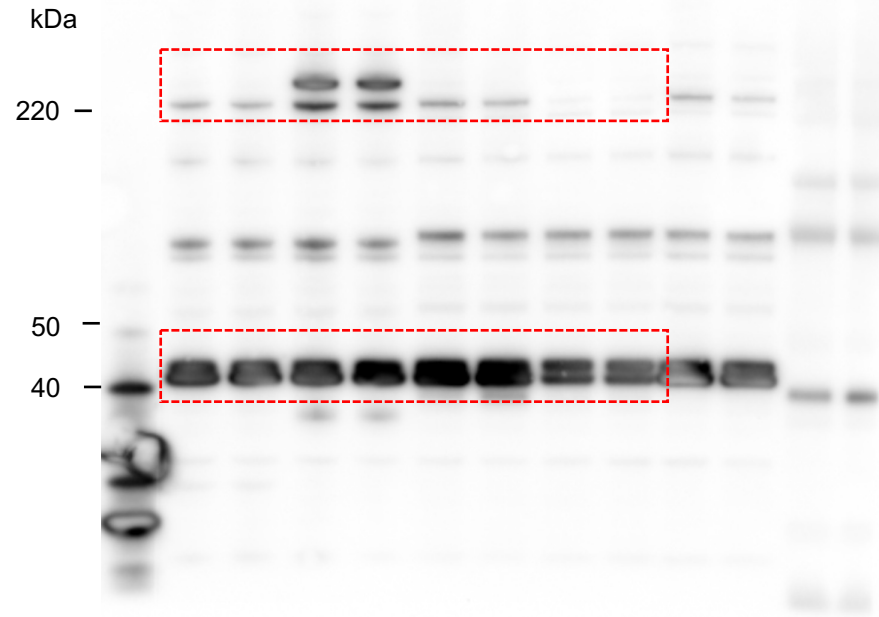

## p180 (Total lysate)

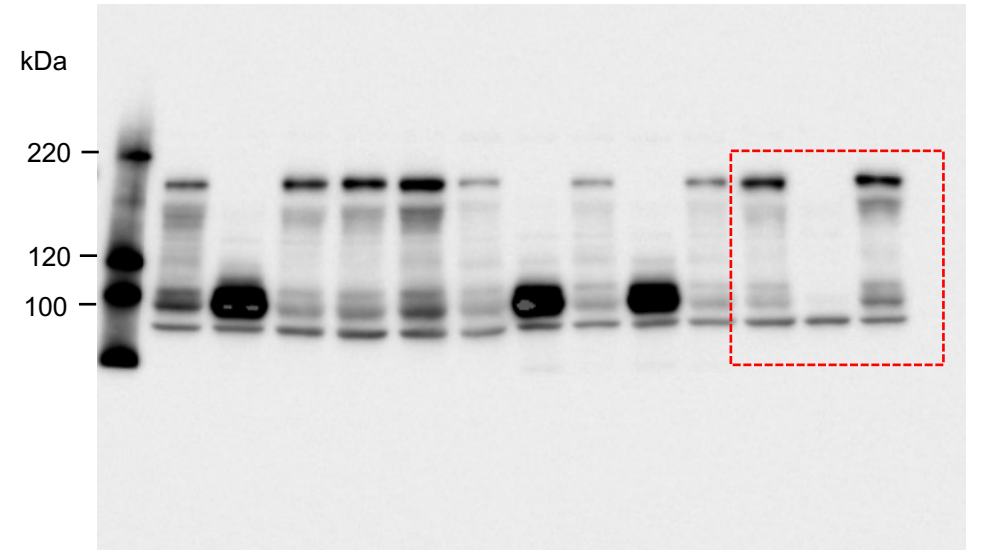

## Climp-63 (RFP or Myc tagged) (Novus)

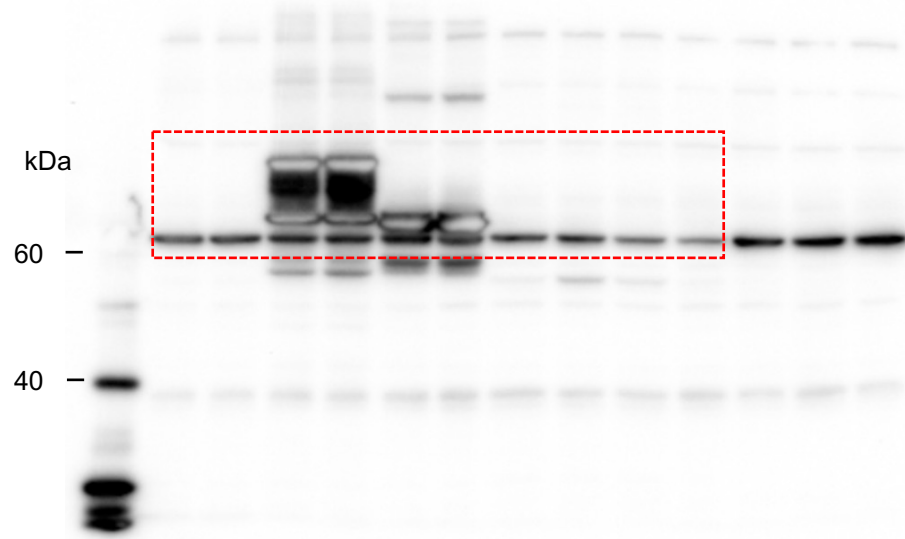

## Climp-63 (RFP or Myc tagged) (Abcam)

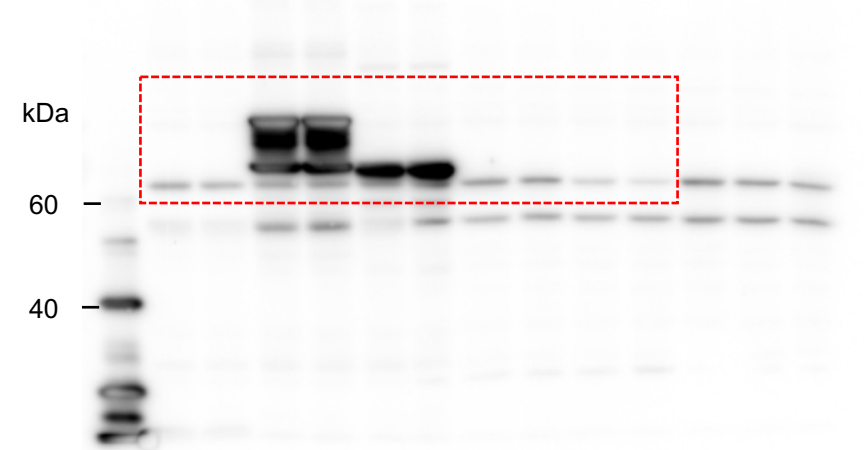

# Ext Data Fig. 6b

## Reep5 (GFP tagged)

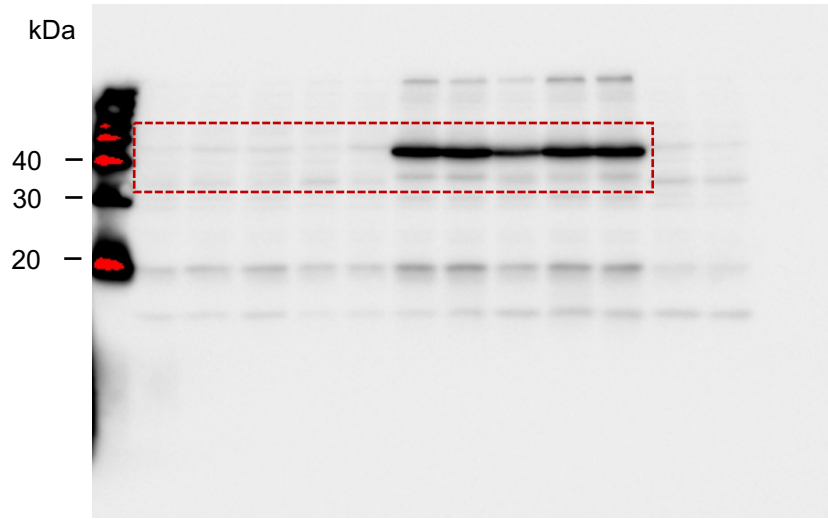

## $\beta$ -Tubulin

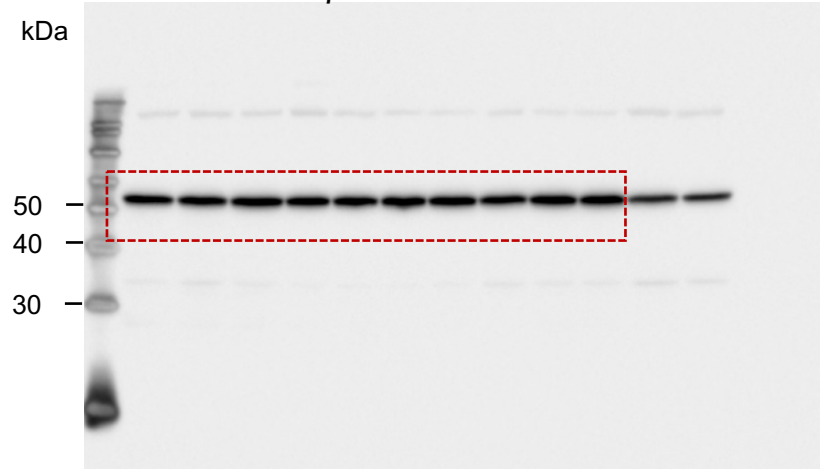

## SCD1

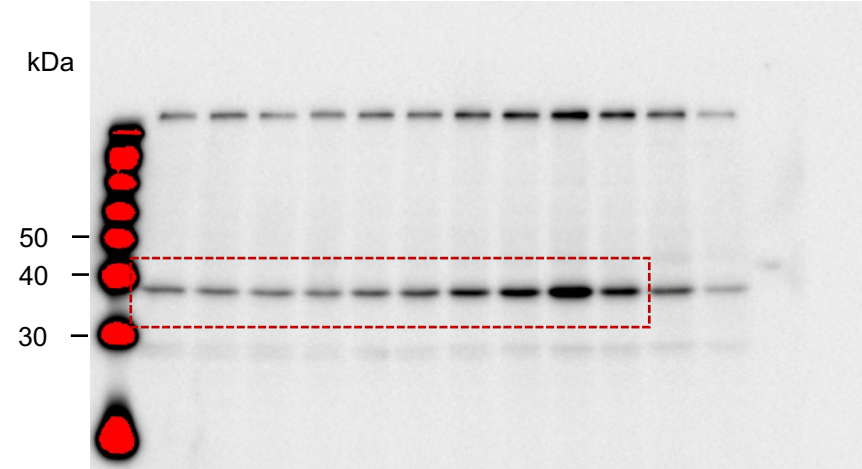

# Ext Data Fig. 6h

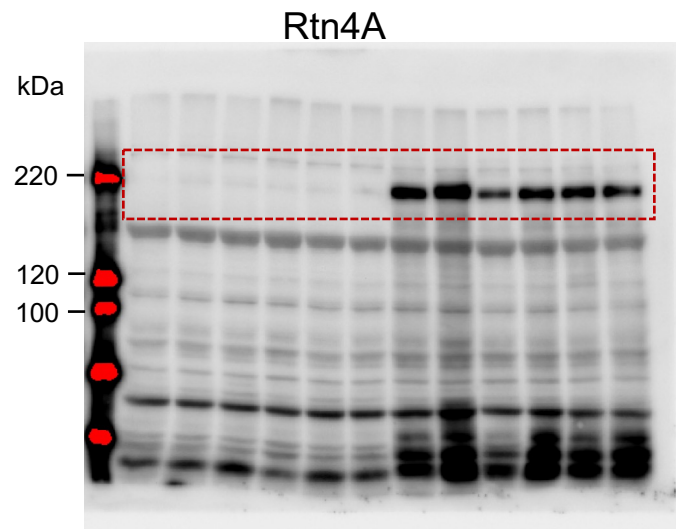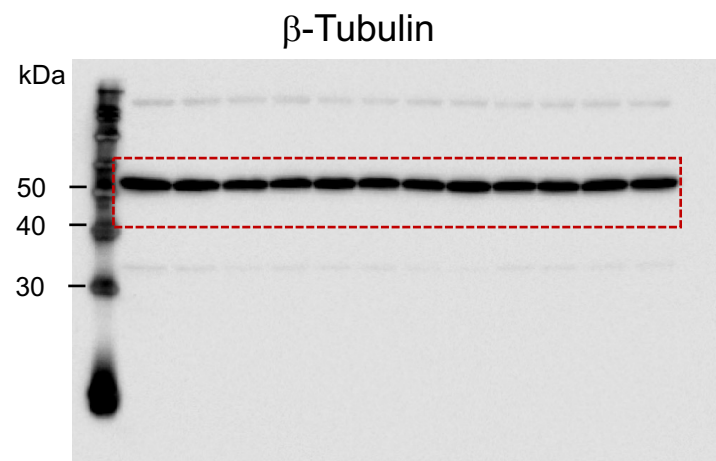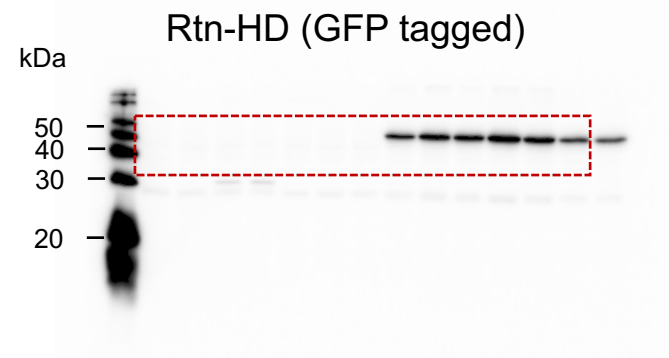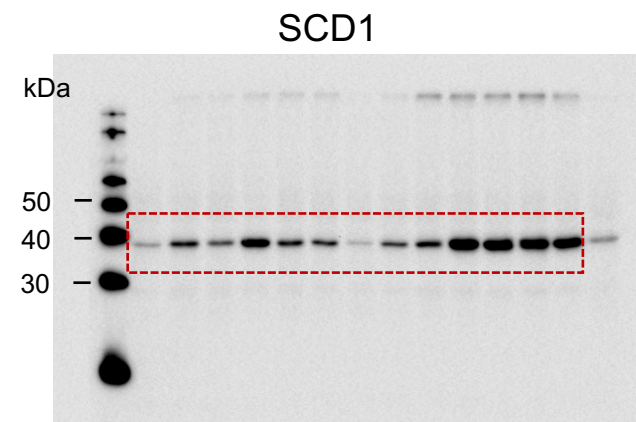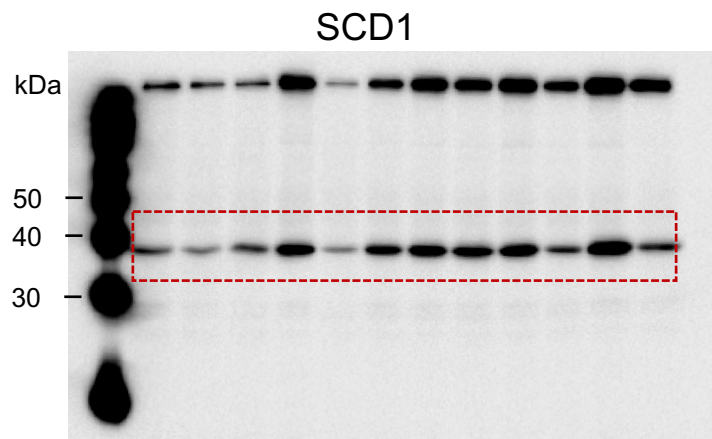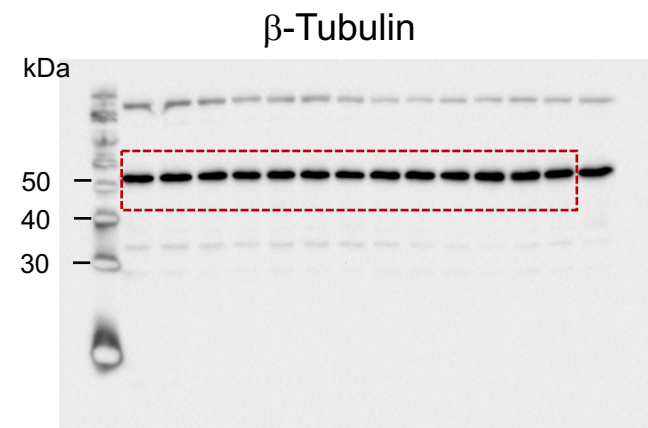

Ext Data Fig. 9b

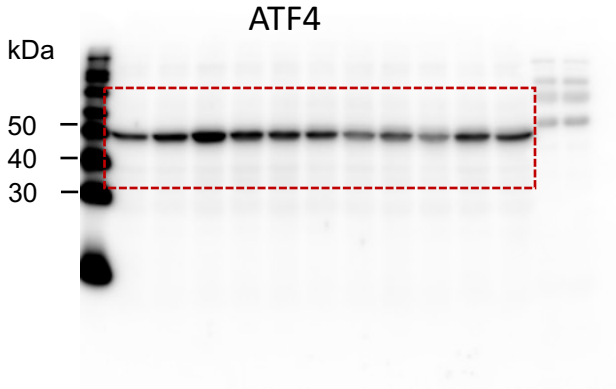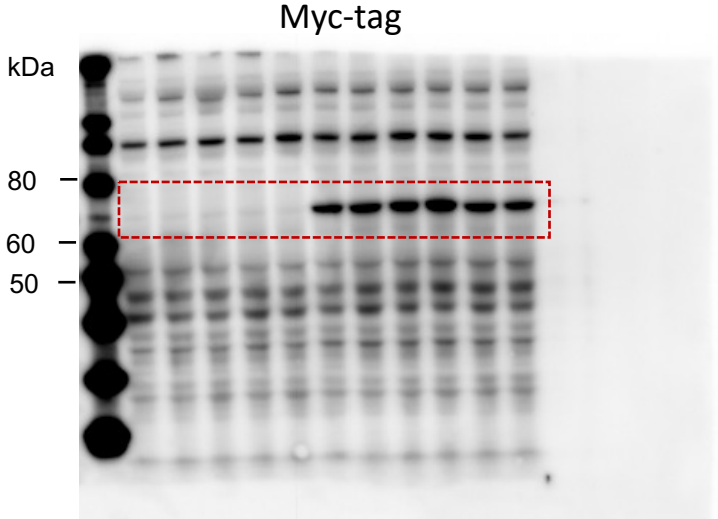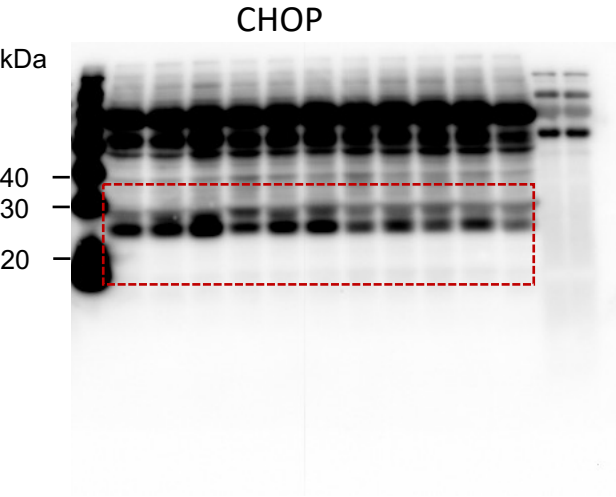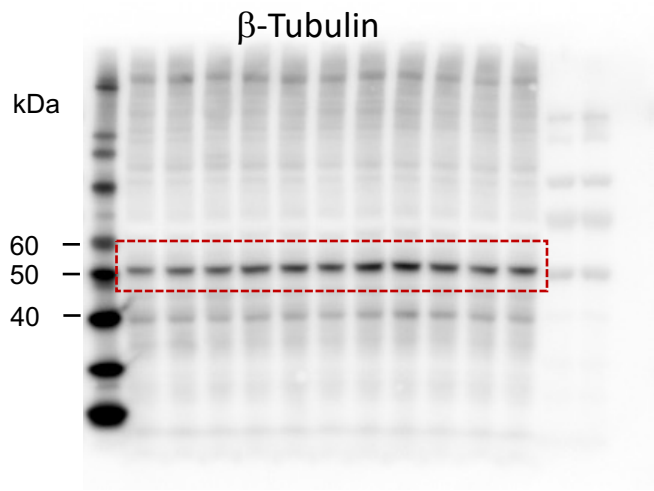

Ext Data Fig. 9c

BiP (GRP78)

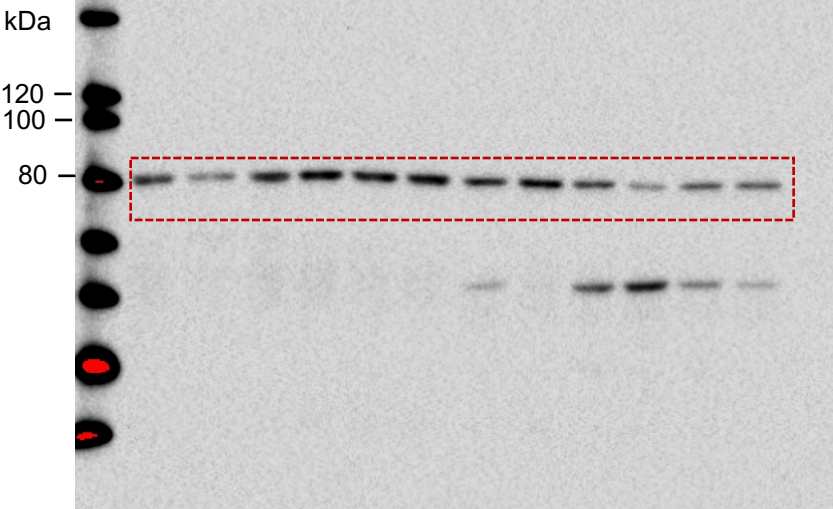

Calnexin

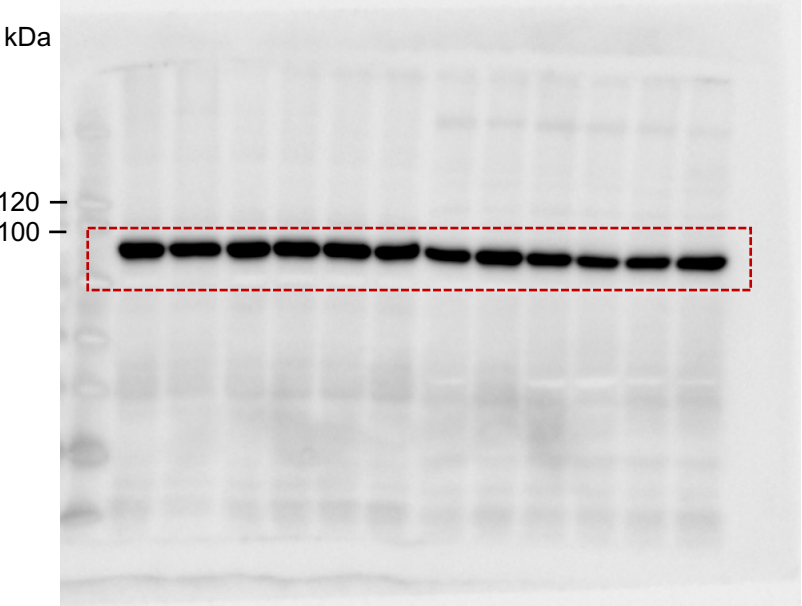



# Ext Data Fig. 9d

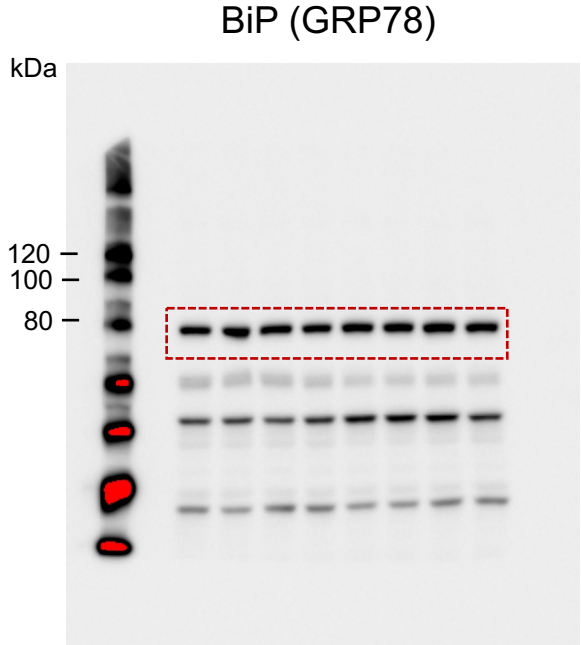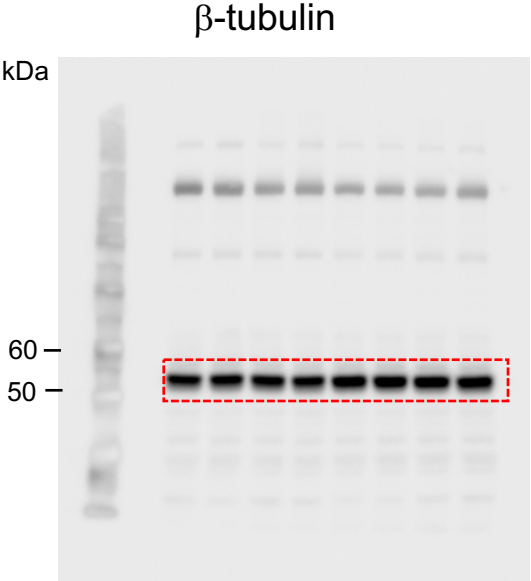

**Ext Data Fig. 9e**

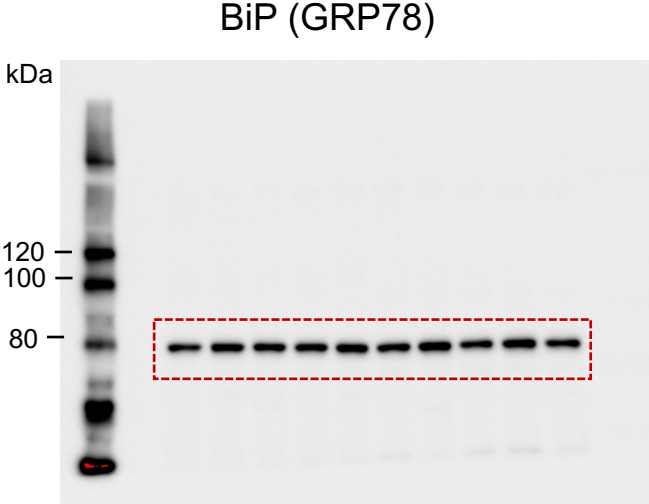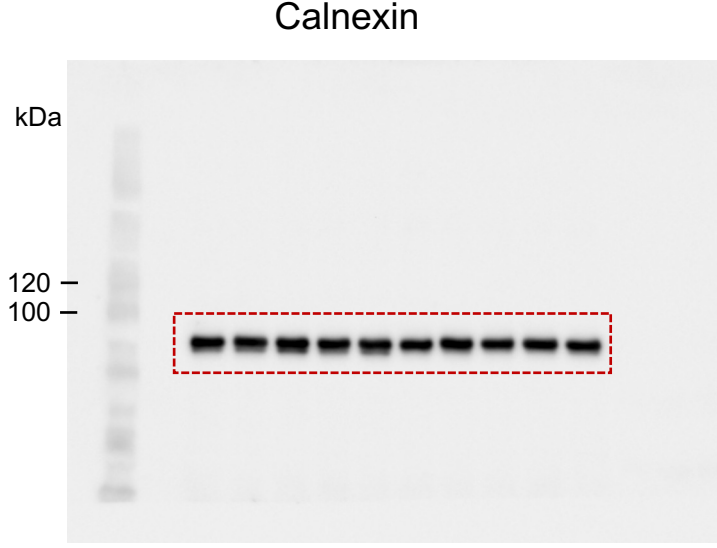

# Ext Data Fig. 10a

## FAS

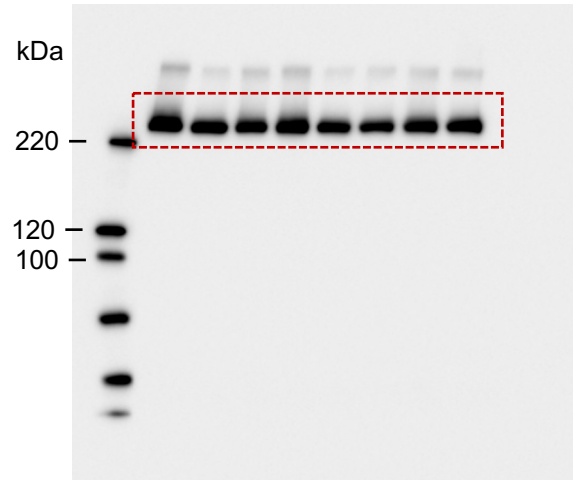

## DGAT2

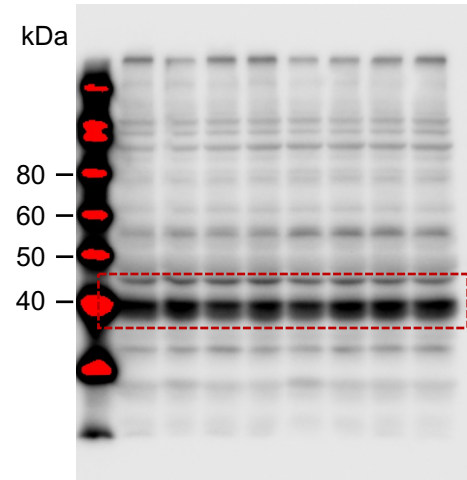

## $\beta$ -tubulin

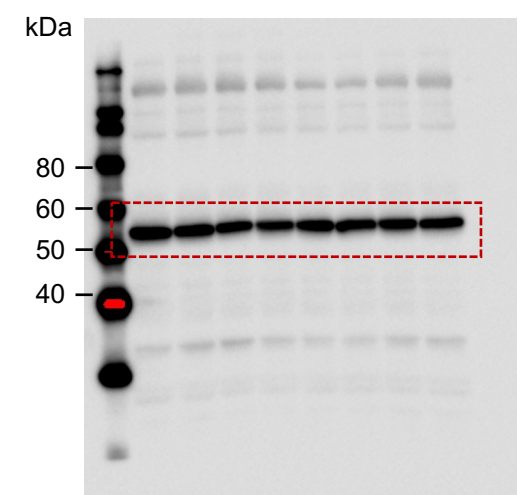

## SCD1

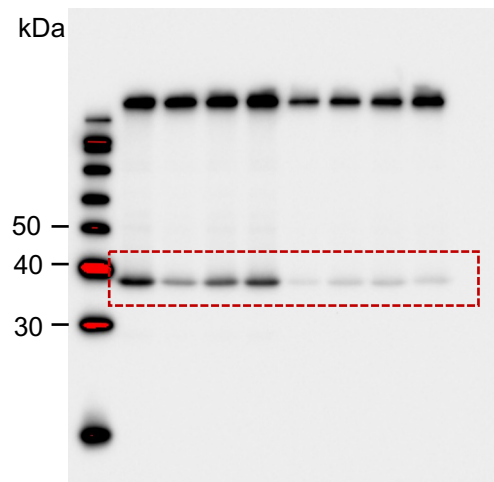

## Climp63

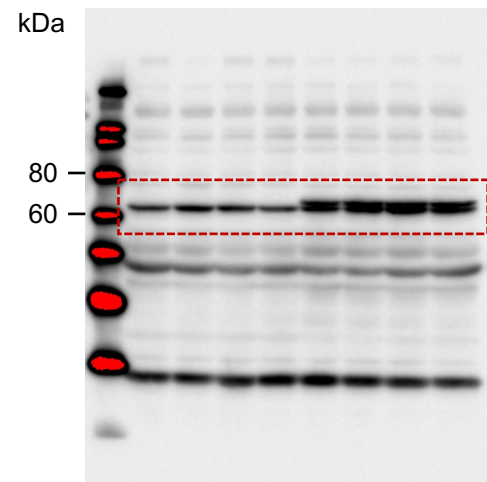

Ext Data Fig. 10b

SCD1

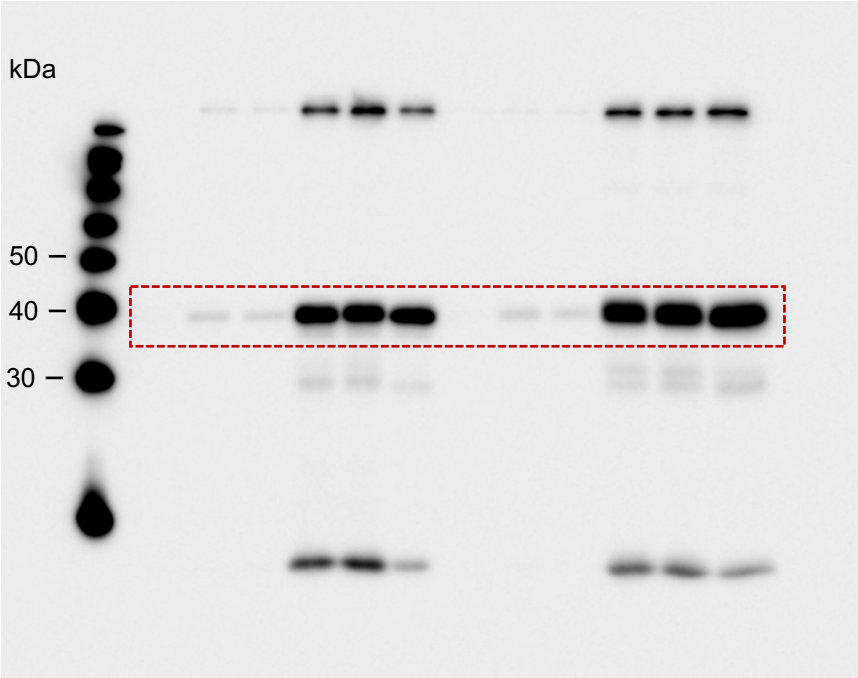

**Ext Data Fig. 10c**

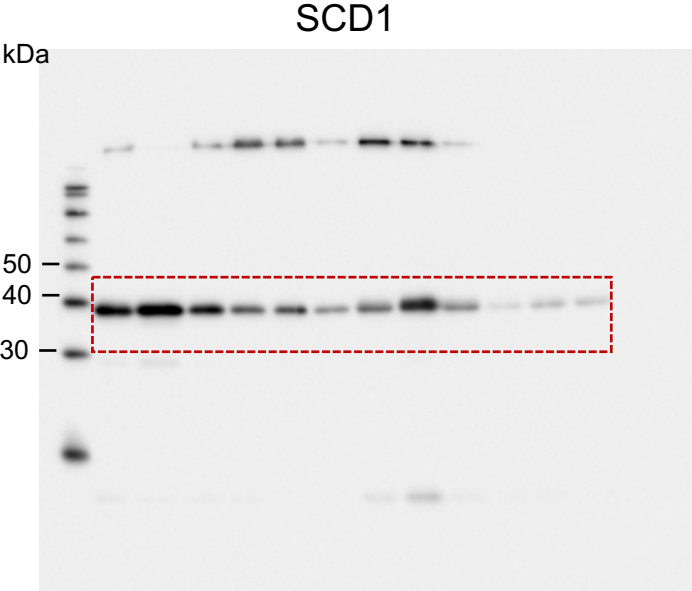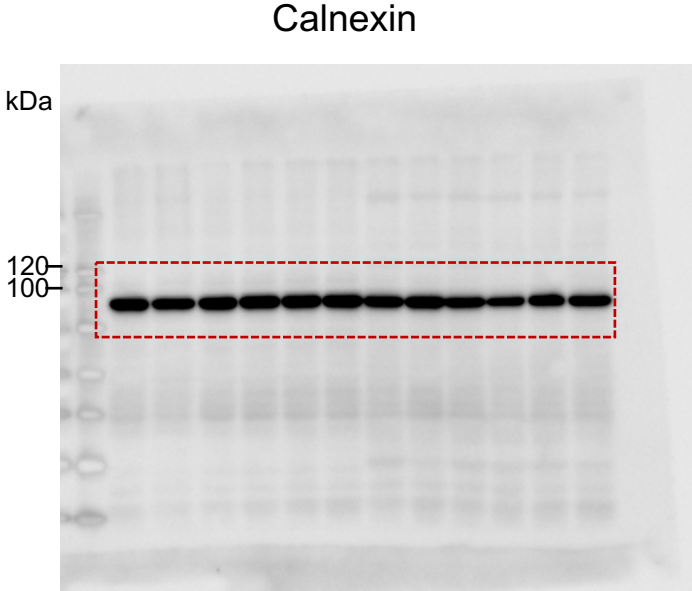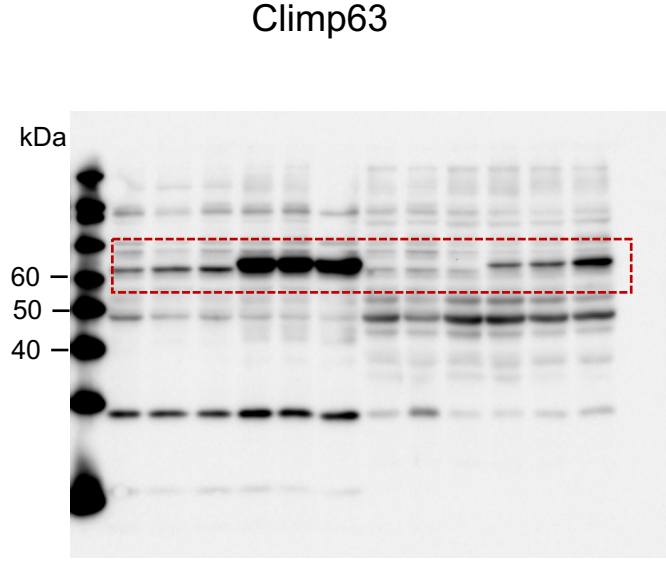

Supplement: NIHMS1793540-supplement-1793540_Sup_Fig_1.pdf [file NIHMS1793540-supplement-1793540_Sup_Fig_1.pdf]
